# Supplementary material for: Estimating immediate post-fire carbon fluxes using the eddy-covariance technique
Source: Copernicus journal article supplement (doi:10.5194/bg-2020-312), 2020-08-27
Supplement: Supplementary file 1 [file bg-2020-312-supplement.pdf]

# **Estimating immediate post-fire carbon fluxes using the eddy-covariance technique**

**Bruna R. F. Oliveira<sup>1</sup>, Carsten Schaller<sup>2</sup>, J. Jacob Keizer<sup>1</sup>, Thomas Foken<sup>3</sup>**

<sup>1</sup> Earth surface processes team, Center for Environmental and Marine Studies (CESAM), Department of Environment and Planning, University of Aveiro, Aveiro, Portugal

<sup>2</sup> Climatology Research Group, Institute of Landscape Ecology, University of Münster, Münster, Germany

<sup>3</sup> Bayreuth Center of Ecology and Environmental Research (BayCEER), University of Bayreuth, Bayreuth, Germany

## **Supplementary material**

### **1. Supplementary Tables S1 to S4**

**Table S1. Summary of published eddy-covariance studies in woodland areas affected by wildfires**

| Reference                   | Location             | Climate Köppen–Geiger system | Dominant tree species before fire/disturbance                                           | Stand observations                                            | Measuring period | NEE [g C m <sup>-2</sup> y <sup>-1</sup> ]*       |
|-----------------------------|----------------------|------------------------------|-----------------------------------------------------------------------------------------|---------------------------------------------------------------|------------------|---------------------------------------------------|
| Present study               | Central Portugal     | Csb                          | <i>Pinus pinaster</i>                                                                   | Stand replacing fire in Aug2017                               | Oct 2017–Oct2018 | -290                                              |
| Sun et al. (2016)           | South Australia      | Bsk                          | <i>Eucalyptus dumosa</i> , <i>E. incrassata</i> , <i>E. oleosa</i> , <i>E. socialis</i> | 1-y after fire May2014-Jul2015                                | May14            | <u>19</u> g C m <sup>-2</sup> month <sup>-1</sup> |
|                             |                      |                              |                                                                                         |                                                               | Jun14            | <u>16</u> g C m <sup>-2</sup> month <sup>-1</sup> |
|                             |                      |                              |                                                                                         |                                                               | Jul14            | <u>11</u> g C m <sup>-2</sup> month <sup>-1</sup> |
|                             |                      |                              |                                                                                         |                                                               | May15            | -18 g C m <sup>-2</sup> month <sup>-1</sup>       |
|                             |                      |                              |                                                                                         |                                                               | Jun15            | -13 g C m <sup>-2</sup> month <sup>-1</sup>       |
|                             |                      |                              |                                                                                         |                                                               | Jul15            | -12 g C m <sup>-2</sup> month <sup>-1</sup>       |
| Dadi et al. (2015)          | Cuenca, Spain        | Csb                          | <i>Pinus nigra</i>                                                                      | High severity, stand-replacing fire in July 2009              | Jun2011–Feb2013  | <u>180</u>                                        |
| Serrano-Ortiz et al. (2011) | SE Spain             | Dsc                          | <i>Pinus sylvestris</i>                                                                 | Burnt Sept 2005; Salvage logging (SL) vs no intervention (NI) | Jun–Dec 2009     | BUR–SL <u>40</u> g C m <sup>-2</sup> per 7-months |
|                             |                      |                              |                                                                                         |                                                               |                  | BUR–NI -90 g C m <sup>-2</sup> per 7-months       |
| Mkhabela et al. (2009)      | Saskatchewan, Canada | Dfb                          | <i>Pinus banksiana</i>                                                                  | BUR 1998                                                      | 2004 and 2005    | <u>20</u>                                         |
|                             |                      |                              |                                                                                         | BUR 1989                                                      |                  | -84                                               |
|                             |                      |                              |                                                                                         | BUR 1977                                                      |                  | +58                                               |
|                             |                      |                              |                                                                                         | BUR 1929                                                      |                  | -20                                               |

|                    |              |     |                        |                                                                     |                      |                                                       |
|--------------------|--------------|-----|------------------------|---------------------------------------------------------------------|----------------------|-------------------------------------------------------|
| Dore et al. (2008) | Arizona, USA | Csa | <i>Pinus ponderosa</i> | High severity, stand-replacing fire 1996 vs Unburnt                 | Sep 2005 to Dec 2006 | <u>109±6</u>                                          |
| Amiro (2001)       | NW Canada    | Dfc | <i>Pinus banksiana</i> | Severely burnt in July 1997; Adjacent UNB with 80 years             | 7-15 Jul 1998        | BUR <u>0.8</u> g C m <sup>-2</sup> d <sup>-1</sup>    |
|                    |              |     |                        | Burnt 1989 and aeriially seeded in 1990; Adjacent UNB with 50 years | 10-26 Aug1999        | BUR = UNB<br>-1.3 g C m <sup>-2</sup> d <sup>-1</sup> |

\*unless other units indicated

**Table S2. Summary of published eddy-covariance studies in unburnt *Pinus pinaster* Ait. woodlands**

| Reference               | Location           | Climate                             | Dominant tree species      | Soil                                  | Stand establishment                                                                                                                            | Tree age [y] | NEP [g C m <sup>-2</sup> y <sup>-1</sup> ]* |
|-------------------------|--------------------|-------------------------------------|----------------------------|---------------------------------------|------------------------------------------------------------------------------------------------------------------------------------------------|--------------|---------------------------------------------|
| Berbigier et al. (2001) | Bordeaux, France   | Cfb                                 | <i>Pinus pinaster</i> Ait  | sandy hydromorphic podzol             | Planted in 1970                                                                                                                                | 28           | 575                                         |
| Kowalski et al. (2003)  | Les Landes, France | Cfb                                 | <i>Pinus pinaster</i> Ait. | sandy podzol                          | Clear-felled 50 y old plantation                                                                                                               | 1            | -290                                        |
| Jarosz et al. (2008)    | Bordeaux, France   | Cfb                                 | <i>Pinus pinaster</i> Ait. | Sandy hydromorphic podzol             | Planted in 1970                                                                                                                                | 32           | 79 total                                    |
|                         |                    |                                     |                            |                                       |                                                                                                                                                |              | -59 understory                              |
|                         |                    |                                     |                            |                                       |                                                                                                                                                |              | 138 tree layer                              |
| Moreaux et al. (2011)   | Bordeaux, France   | Cfb                                 | <i>Pinus pinaster</i> Ait. | Sandy podzol                          | Clear cut 1999; ploughed and fertilized 2001; seeded 2004.<br>A: without intervention<br>B: removal of weed and thinning of trees in 2008/2009 | A: 4         | 243                                         |
|                         |                    |                                     |                            |                                       |                                                                                                                                                | B: 5         | 65                                          |
| Matteucci et al. (2015) | Tuscany, Italy     | Csa (study year was atypically dry) | <i>Pinus pinaster</i> Ait. | 93% sand, 3% silt; 4% clay. 43.8% SOM | Natural regeneration following a wildfire in 1944                                                                                              | 64           | (May'01-March'02)<br>21                     |

\*unless other units indicated

**Table S3. Summary of the floristic composition on 10 September 2018 as determined by vegetation releves at the 5 points along the transect in the targeted footprint area**

| <b>Higher plant species</b>     | <b>Average and standard deviation of projected ground cover (%)</b> |
|---------------------------------|---------------------------------------------------------------------|
| <i>Cistus psilosepalus</i>      | 23 ± 18                                                             |
| <i>Agrostis truncatula</i>      | 15 ± 0                                                              |
| <i>Cistus ladanifer</i>         | 14 ± 10                                                             |
| <i>Eucalyptus globulus</i>      | 10 ± 0                                                              |
| <i>Halimium ocymoides</i>       | 7 ± 5                                                               |
| <i>Calluna vulgaris</i>         | 7 ± 6                                                               |
| <i>Pterospartum tridentatum</i> | 7 ± 2                                                               |
| <i>Erica spec.</i>              | 5 ± 0                                                               |
| <i>Arbutus unedo</i>            | 5 ± 0                                                               |
| <i>Phyllirea angustifolia</i>   | 4 ± 4                                                               |
| <i>Pinus pinaster</i>           | 3 ± 2                                                               |
| <i>Lavandula pedunculata</i>    | 2 ± 0                                                               |
| <i>Genista trichantos</i>       | 2 ± 1                                                               |
| <i>Conyza bonariensis</i>       | 2 ± 1                                                               |
| <i>Anarrhinum bellidifolium</i> | 1 ± 0                                                               |
| <i>Pteridium aquilinum</i>      | 1 ± 0                                                               |
| <i>Jasione montana</i>          | 1 ± 0                                                               |
| <i>Hakea sericea</i>            | 1 ± 0                                                               |

## 2. Supplementary Figures

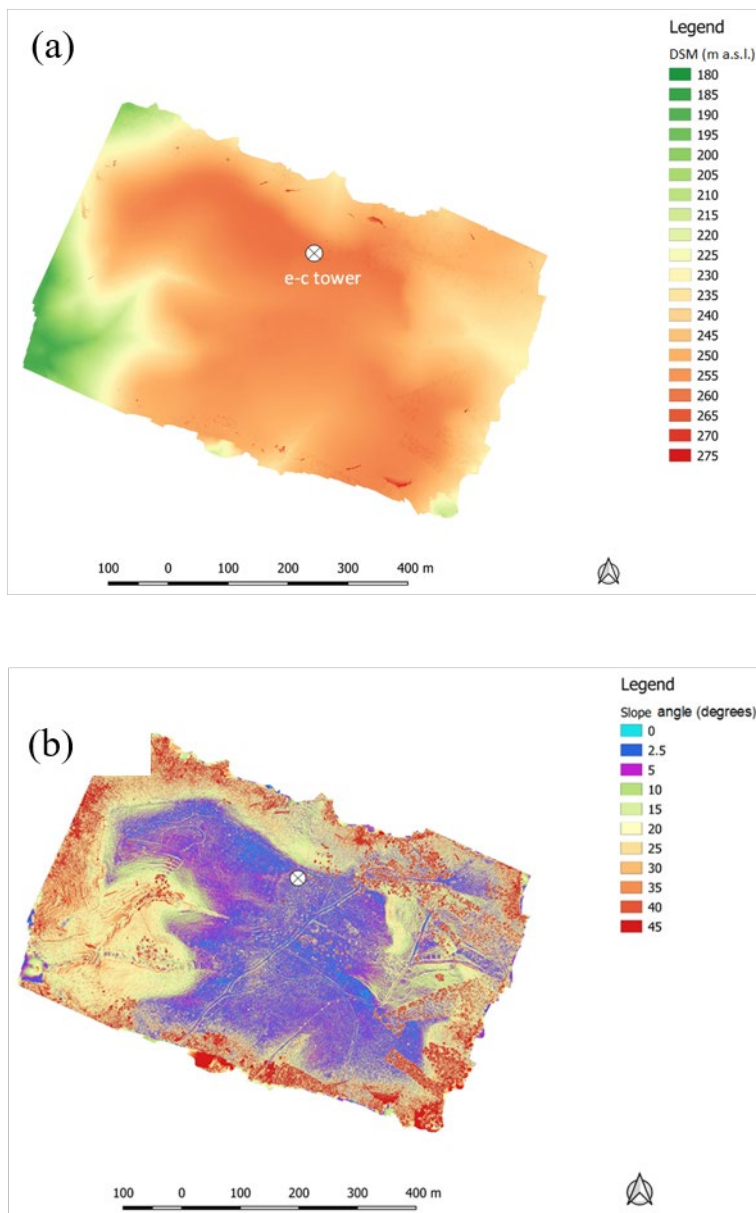

Figure S1. Digital surface model and associated slope angle map derived from aerial photography of the burnt area surrounding the flux tower that was acquired with a RGB camera mounted on a drone (DJI Phantom 3) on 18 July 2017. (tower: circle with cross)

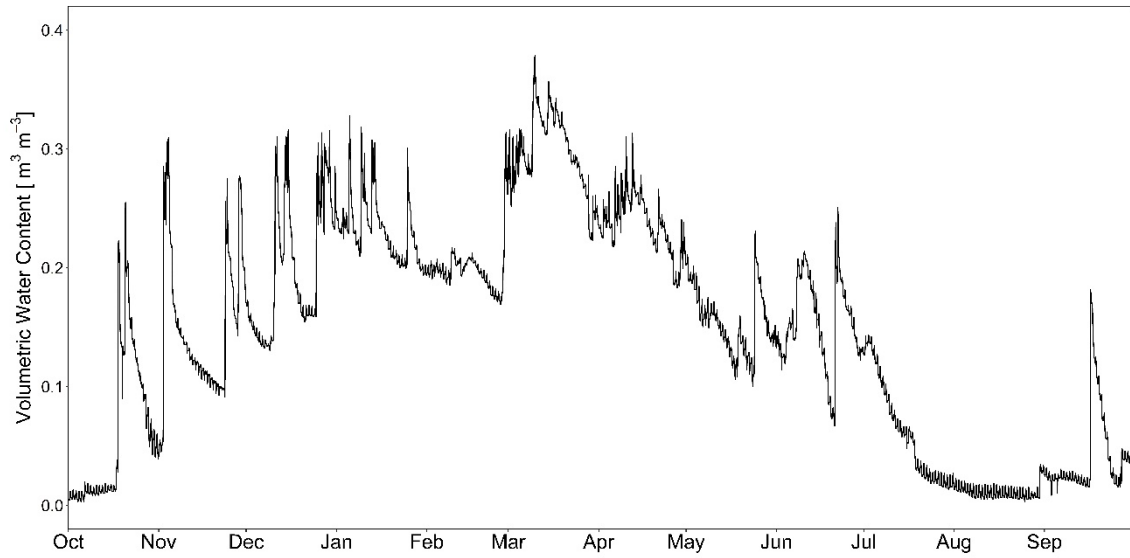

**Figure S2. Median 30- minute volumetric soil water content during the 2017/18 hydrological year at 2.5 cm depth at five inter-patches along a transect laid out to the west of the flux tower in the Maritime pine footprint area.**

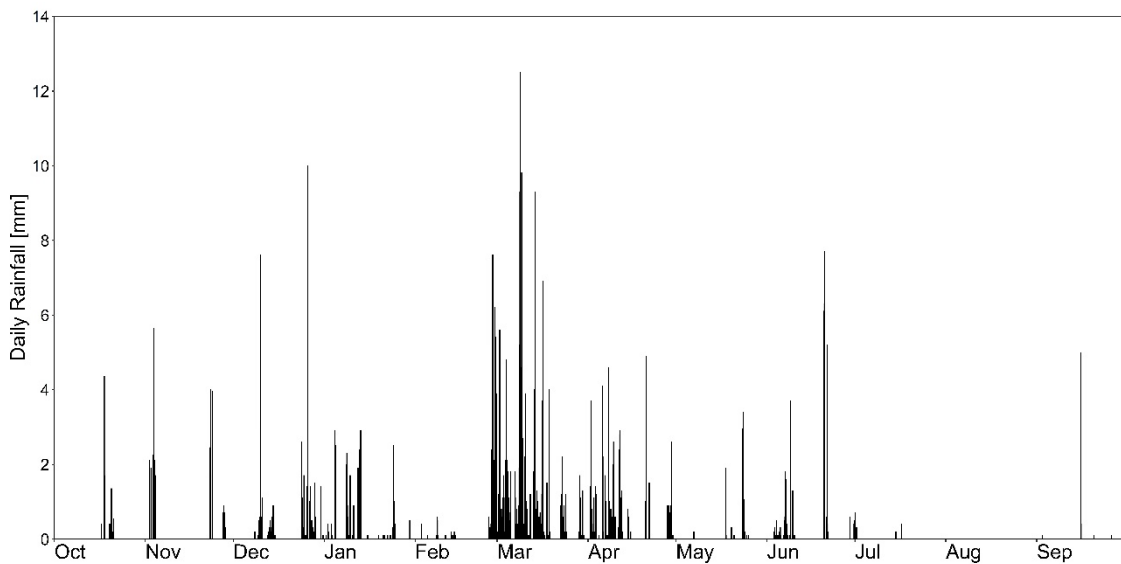

**Figure S3: Daily rainfall during the 2017/18 hydrological year as recorded by the automatic gauges installed in the study area.**

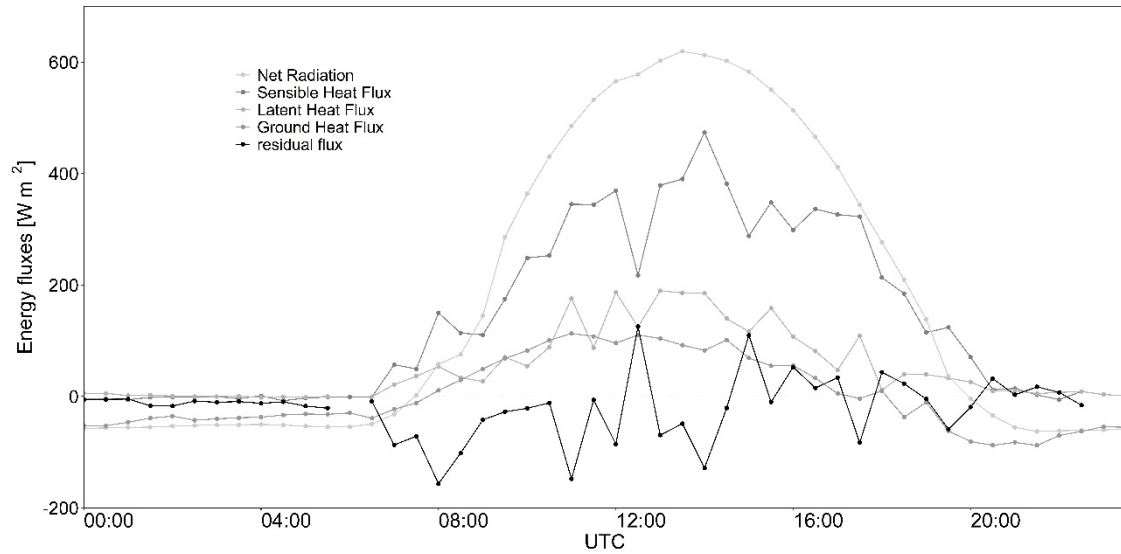

**Figure S4.** Daily cycle of energy fluxes and their residual on 24 June 2018, when the sky was predominantly clear, except for some high clouds around the local noon at 12:38 UTC. From 08:00 to 19:30 UTC, the footprint consisted for more than 80% of the Maritime pine woodland.

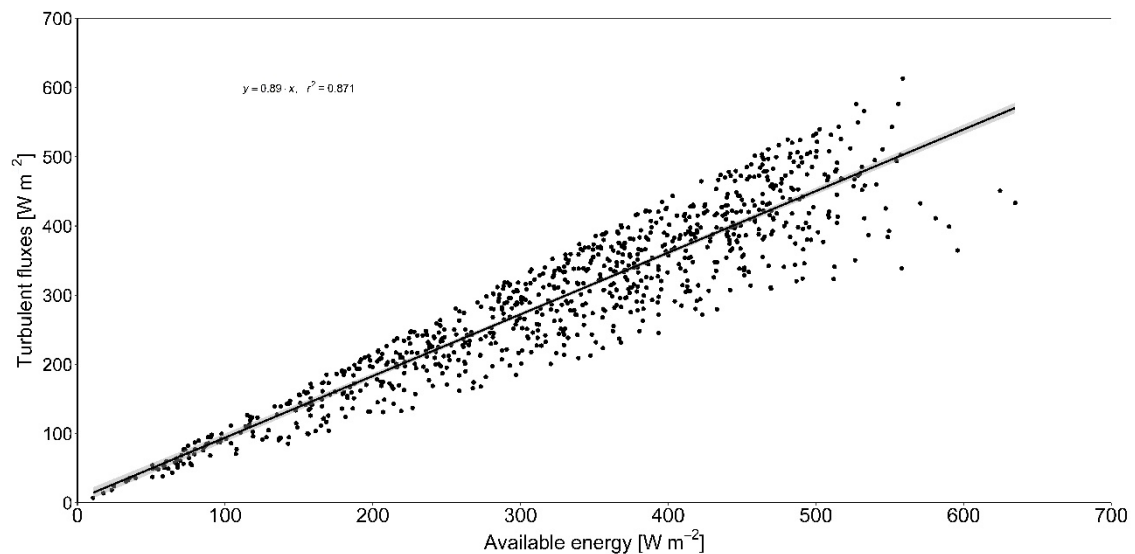

**Figure S5.** Relationship of turbulent fluxes with available energy for all 30-minute data records that met four conditions: (i) >80% of the footprint area corresponded to the burnt pine woodland; (ii) the quality flags for the turbulent fluxes ranged from 1 to 6; (iii) sensible and latent heat fluxes were larger than the detection limit of  $10 \text{ W m}^{-2}$ ; the ration of latent to sensible heat fluxes passed a MAD-test with  $q=0.5$ .



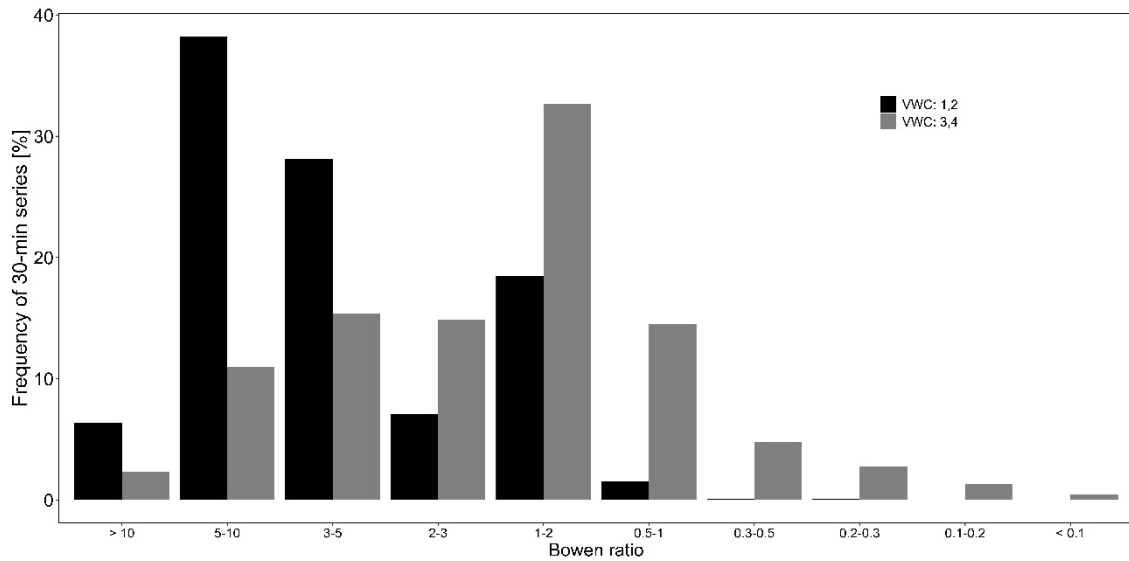

Figure S6. Frequency distribution of the ratio of sensible and latent heat fluxes (Bowen ratio) for two contrasting soil moisture conditions (Volumetric Water Content classes 1 and 2 vs. 3 and 4). The same 30-minute data records as used for Figure S5.

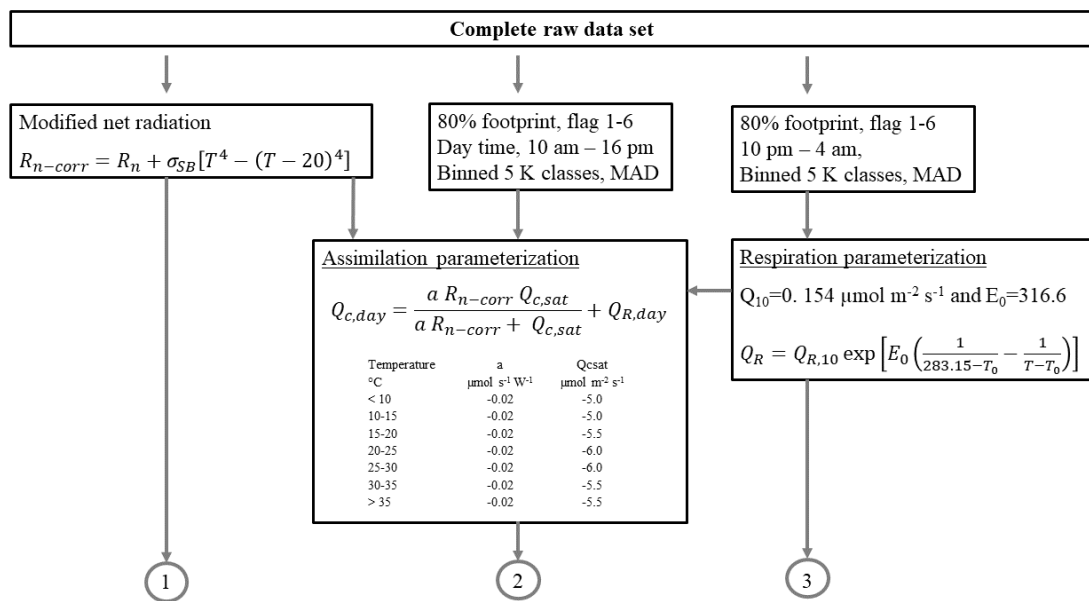

Figure S7. Flow chart of the calculation of the parameters for gap filling of 30-min assimilation and respiration fluxes.

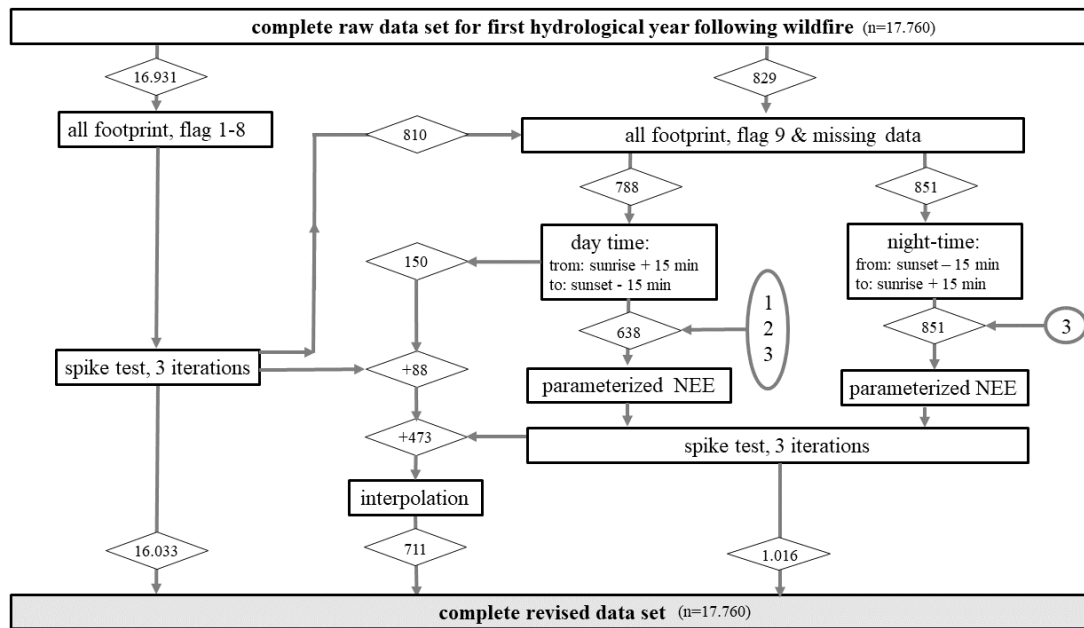

Figure S8. Flow chart of the revision of the raw 30-min data.

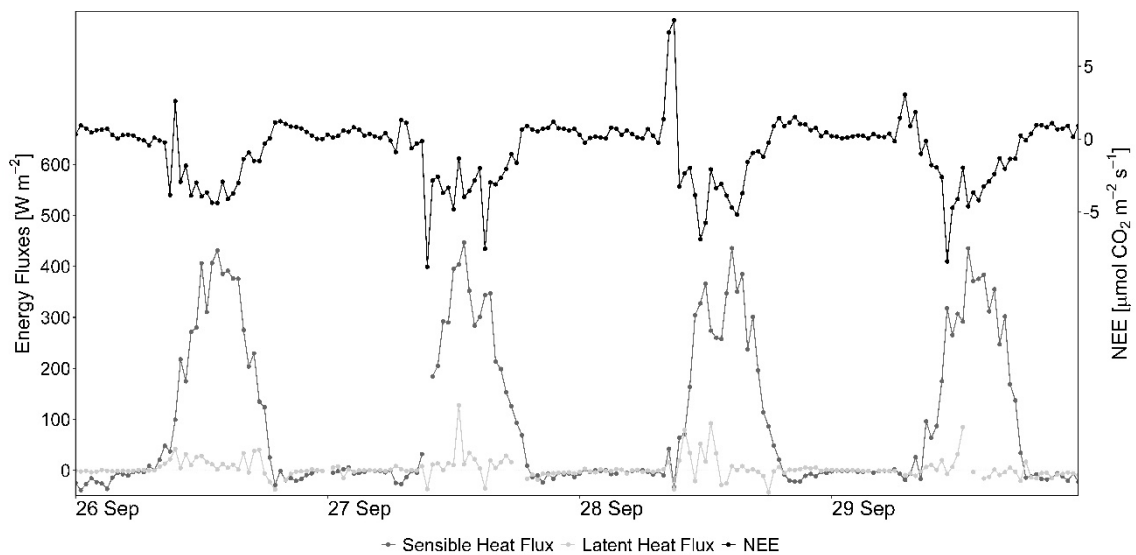

Figure S9. Daily cycles of 30-min sensible and latent heat fluxes and NEE fluxes for the immediate post-fire period from 26 to 29 September 2017. Figure S10 shows the daily cycles of relative humidity together with those of the NEE fluxes.

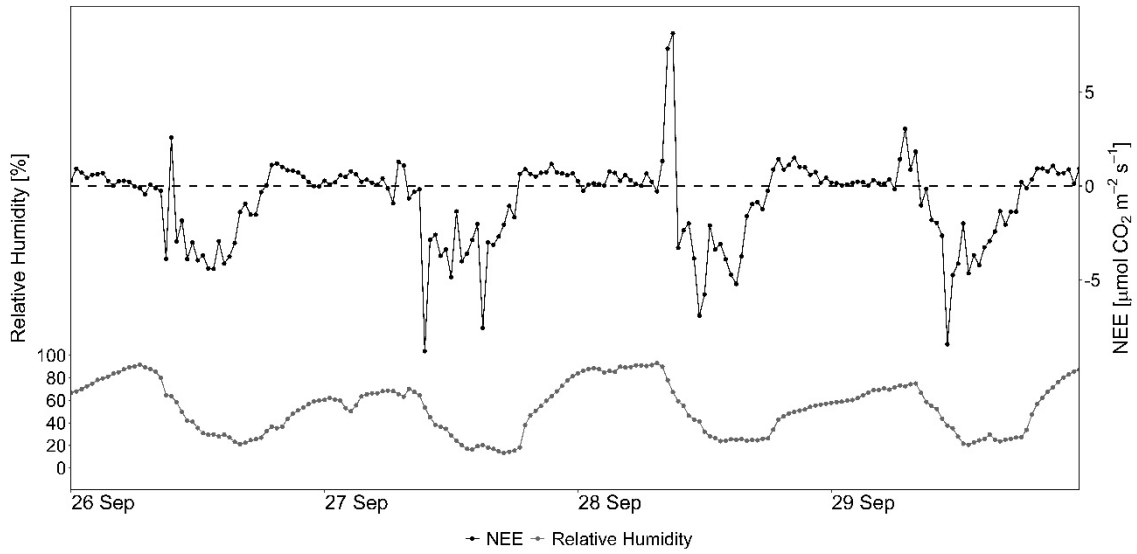

**Figure S10.** Daily cycles of 30-min relative humidity and NEE fluxes for the immediate post-fire period from 26 to 29 September 2017.

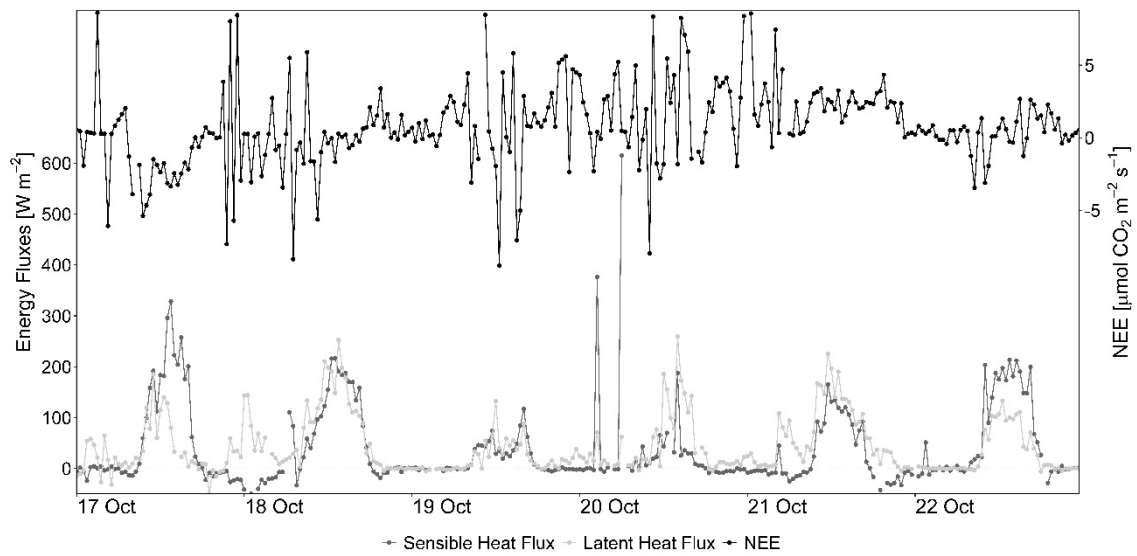

**Figure S11.** Daily cycles of 30-min sensible and latent heat fluxes and NEE fluxes following the first two significant post-fire rainfall events during the night from 17 to 18 October 2017 and around noon on 20 October 2017.

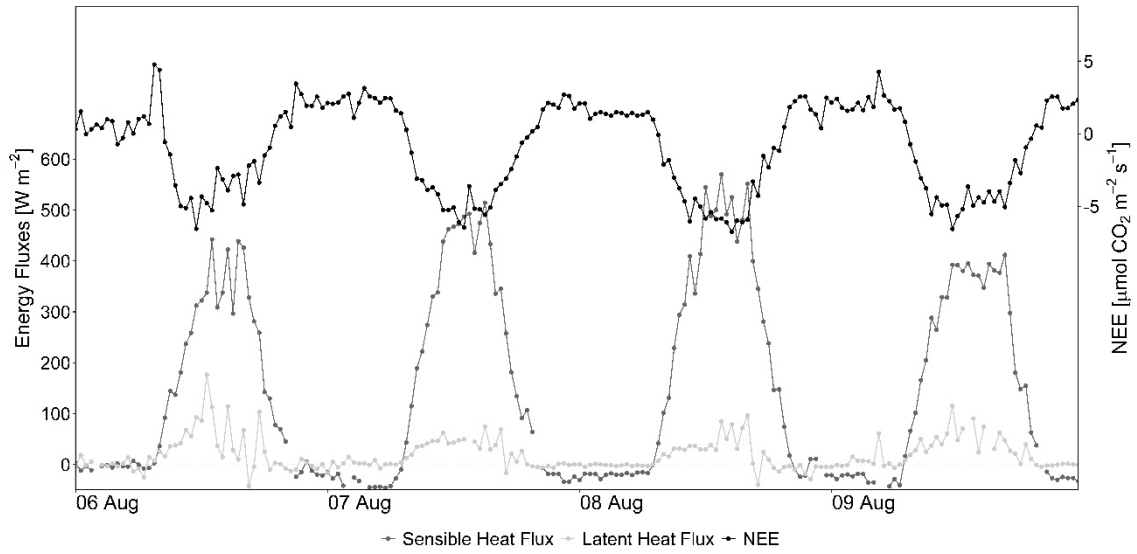

**Figure S12.** Daily cycles of 30-min sensible and latent heat fluxes and NEE fluxes during mid-summer 2018, from 6 to 9 August, when these fluxes originated from the eucalypt patches.

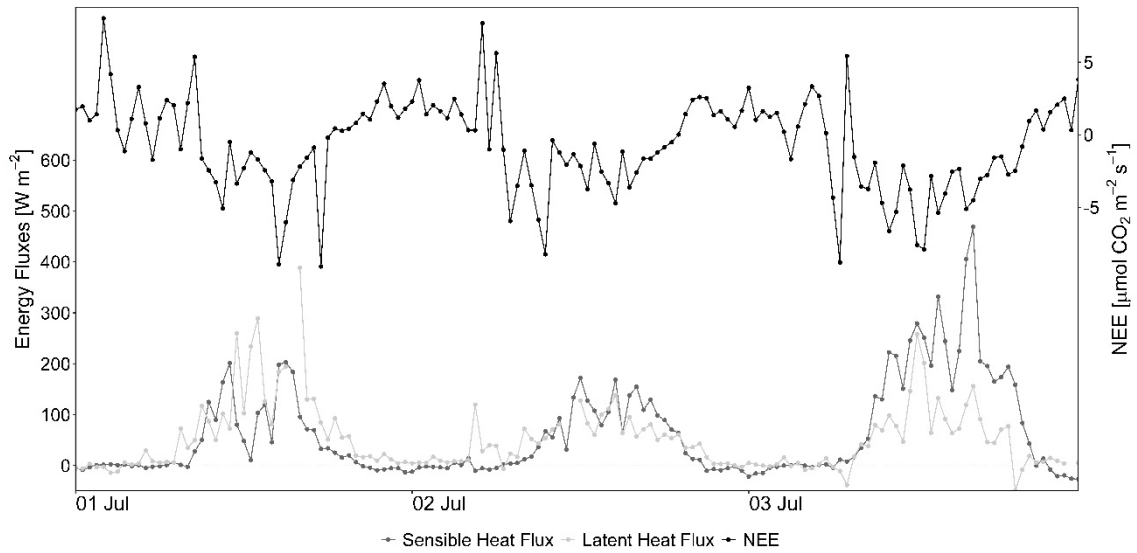

**Figure S13.** Daily cycles of 30-min sensible and latent heat fluxes and NEE fluxes during early summer 2018, from 1 to 3 July, when these fluxes originated from the Maritime pine woodlands.

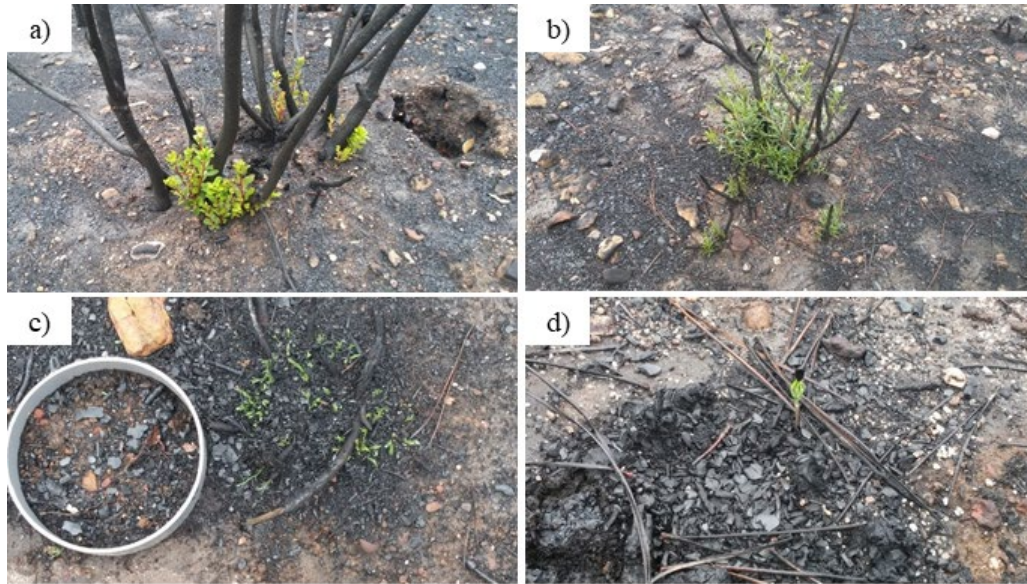

**Figure S14. Illustration of post-fire vegetation recovery by 3 January 2018, showing three resprouter shrub species of the understory (a) *Arbutus unedo*; b) *Phillyrea angustifolia*; c) *Pterospartum tridentatum*; and d) Maritime pine seedling. (Pictures by J. Jacob Keizer)**

#### References

- Amiro, B. D.: Paired-tower measurements of carbon and energy fluxes following disturbance in the boreal forest, *Glob. Chang. Biol.*, 7(3), 253–268, doi:10.1046/j.1365-2486.2001.00398.x, 2001.
- Berbigier, P., Bonnefond, J.-M. M. and Mellmann, P.: CO<sub>2</sub> and water vapour fluxes for 2 years above Euroflux forest site, *Agric. For. Meteorol.*, 108(3), 183–197, doi:10.1016/S0168-1923(01)00240-4, 2001.
- Chan, F. C. C., Altaf Arain, M., Khomik, M., Brodeur, J. J., Peichl, M., Restrepo-Coupe, N., Thorne, R., Beamesderfer, E., McKenzie, S., Xu, B., Croft, H., Pejam, M., Trant, J., Kula, M. and Skubel, R.: Carbon, water and energy exchange dynamics of a young pine plantation forest during the initial fourteen years of growth, *For. Ecol. Manage.*, 410, 12–26, doi:10.1016/J.FORECO.2017.12.024, 2018.
- Dadi, T., Rubio, E., Martínez-García, E., López-Serrano, F. R., Andrés-Abellán, M., García-Morote, F. A. and De las Heras, J.: Post-wildfire effects on carbon and water vapour dynamics in a Spanish black pine forest., *Environ. Sci. Pollut. Res. Int.*, 22(7), 4851–62, doi:10.1007/s11356-014-3744-4, 2015.
- Dore, S., Kolb, T. E., Montes-Helu, M., Sullivan, B. W., Winslow, W. D., Hart, S. C., Kaye, J. P., Koch, G. W. and Hungate, B. A.: Long-term impact of a stand-replacing fire on ecosystem CO<sub>2</sub> exchange of a ponderosa pine forest, *Glob. Chang. Biol.*, 14(8), 1801–1820, doi:10.1111/j.1365-2486.2008.01613.x, 2008.

van Gorsel, E., Berni, J. A. J., Briggs, P., Cabello-Leblic, A., Chasmer, L., Cleugh, H. A., Hacker, J., Hantson, S., Haverd, V., Hughes, D., Hopkinson, C., Keith, H., Kljun, N., Leuning, R., Yebra, M. and Zegelin, S.: Primary and secondary effects of climate variability on net ecosystem carbon exchange in an evergreen Eucalyptus forest, *Agric. For. Meteorol.*, 182–183, 248–256, doi:10.1016/J.AGRFORMET.2013.04.027, 2013.

Jarosz, N., Brunet, Y., Lamaud, E., Irvine, M., Bonnefond, J.-M. and Loustau, D.: Carbon dioxide and energy flux partitioning between the understorey and the overstorey of a maritime pine forest during a year with reduced soil water availability, *Agric. For. Meteorol.*, 148(10), 1508–1523, doi:10.1016/J.AGRFORMET.2008.05.001, 2008.

Kowalski, S., Sartore, M., Burlett, R., Berbigier, P. and Loustau, D.: The annual carbon budget of a French pine forest (*Pinus pinaster*) following harvest, *Glob. Chang. Biol.*, 9(7), 1051–1065, doi:10.1046/j.1365-2486.2003.00627.x, 2003.

Kulmala, L., Pumpanen, J., Kolari, P., Dengel, S., Berninger, F., Köster, K., Matkala, L., Vanhatalo, A., Vesala, T. and Bäck, J.: Inter- and intra-annual dynamics of photosynthesis differ between forest floor vegetation and tree canopy in a subarctic Scots pine stand, *Agric. For. Meteorol.*, 271, 1–11, doi:10.1016/J.AGRFORMET.2019.02.029, 2019.

Matteucci, M., Gruening, C., Gode Ballarin, I., Seufert, G. and Cescatti, A.: Components, drivers and temporal dynamics of ecosystem respiration in a Mediterranean pine forest, *Soil Biol. Biochem.*, 88, 224–235, doi:10.1016/j.soilbio.2015.05.017, 2015.

Mkhabela, M. S., Amiro, B. D., Barr, A. G., Black, T. A., Hawthorne, I., Kidston, J., McCaughey, J. H., Orchansky, A. L., Nesic, Z., Sass, A., Shashkov, A. and Zha, T.: Comparison of carbon dynamics and water use efficiency following fire and harvesting in Canadian boreal forests, *Agric. For. Meteorol.*, 149(5), 783–794, doi:10.1016/j.agrformet.2008.10.025, 2009.

Moreaux, V., Lamaud, É., Bosc, A., Bonnefond, J. M., Medlyn, B. E. and Loustau, D.: Paired comparison of water, energy and carbon exchanges over two young maritime pine stands (*Pinus pinaster* Ait.): Effects of thinning and weeding in the early stage of tree growth, *Tree Physiol.*, 31(9), 903–921, doi:10.1093/treephys/tpr048, 2011.

Peichl, M., Brodeur, J. J., Khomik, M. and Arain, M. A.: Biometric and eddy-covariance based estimates of carbon fluxes in an age-sequence of temperate pine forests, *Agric. For. Meteorol.*, 150(7–8), 952–965, doi:10.1016/J.AGRFORMET.2010.03.002, 2010.

Rodrigues, A., Pita, G., Mateus, J., Kurz-Besson, C., Casquilho, M., Cerasoli, S., Gomes, A. and Pereira, J.: Eight years of continuous carbon fluxes measurements in a Portuguese eucalypt stand under two main events: Drought and felling, *Agric. For. Meteorol.*, 151(4), 493–507,

doi:10.1016/J.AGRFORMET.2010.12.007, 2011.

Serrano-Ortiz, P., Marañón-Jiménez, S., Reverter, B. R., Sánchez-Cañete, E. P., Castro, J., Zamora, R. and Kowalski, A. S.: Post-fire salvage logging reduces carbon sequestration in Mediterranean coniferous forest, *For. Ecol. Manage.*, 262(12), 2287–2296, doi:10.1016/j.foreco.2011.08.023, 2011.

Sun, Q., Meyer, W. S., Koerber, G. R. and Marschner, P.: A wildfire event influences ecosystem carbon fluxes but not soil respiration in a semi-arid woodland, *Agric. For. Meteorol.*, 226–227, 57–66, doi:10.1016/j.agrformet.2016.05.019, 2016.
